# Supplementary material for: Monitoring Appropriate Monoclonal Antibodies Prescribing via Administrative Data: An Application to Psoriasis
Source: MDPI journal article supplement (doi:10.3390/ph15101238), 2022-10-08
Supplement: s1 [file s1]

**Table S1**

|               | <b>First<br/>supply,<br/>line of<br/>treatment</b> | <b>Last supply,<br/>line of<br/>treatment</b> | <b>Number of<br/>patients</b> | <b>% over the<br/>total per<br/>AV</b> |
|---------------|----------------------------------------------------|-----------------------------------------------|-------------------------------|----------------------------------------|
| North-West AV | 1st                                                | 1st                                           | 1079                          | 54.22%                                 |
| North-West AV | 1st                                                | 2nd                                           | 237                           | 11.91%                                 |
| North-West AV | 2nd                                                | 1st                                           | 44                            | 2.21%                                  |
| North-West AV | 2nd                                                | 2nd                                           | 630                           | 31.66%                                 |
| Centre AV     | 1st                                                | 1st                                           | 1370                          | 60.92%                                 |
| Centre AV     | 1st                                                | 2nd                                           | 197                           | 8.76%                                  |
| Centre AV     | 2nd                                                | 1st                                           | 62                            | 2.76%                                  |
| Centre AV     | 2nd                                                | 2nd                                           | 620                           | 27.57%                                 |
| South-East AV | 1st                                                | 1st                                           | 742                           | 49.34%                                 |
| South-East AV | 1st                                                | 2nd                                           | 174                           | 11.57%                                 |
| South-East AV | 2nd                                                | 1st                                           | 45                            | 2.99%                                  |
| South-East AV | 2nd                                                | 2nd                                           | 543                           | 36.10%                                 |

Table S2

|                       | Number of patients treated<br>in 2020 with second-line<br>mAbs | Cohort of 2020 psoriatic<br>patients | % Over the total<br>cohort |
|-----------------------|----------------------------------------------------------------|--------------------------------------|----------------------------|
| <b>Adalimumab</b>     |                                                                |                                      |                            |
| <b>Tuscany region</b> | 634                                                            | 5743                                 | 11.04%                     |
| North-West AV         | 267                                                            | 1990                                 | 13.42%                     |
| Centre AV             | 187                                                            | 2249                                 | 8.31%                      |
| South-East AV         | 180                                                            | 1504                                 | 11.96%                     |
| <b>Etanercept</b>     |                                                                |                                      |                            |
| <b>Tuscany region</b> | 412                                                            | 5743                                 | 7.17%                      |
| North-West AV         | 150                                                            | 1990                                 | 7.54%                      |
| Centre AV             | 150                                                            | 2249                                 | 6.69%                      |
| South-East AV         | 112                                                            | 1504                                 | 7.45%                      |
| <b>Sekukinumab</b>    |                                                                |                                      |                            |
| <b>Tuscany region</b> | 285                                                            | 5743                                 | 4.96%                      |
| North-West AV         | 97                                                             | 1990                                 | 4.87%                      |
| Centre AV             | 97                                                             | 2249                                 | 4.31%                      |
| South-East AV         | 91                                                             | 1504                                 | 6.05%                      |
| <b>Ustekinumab</b>    |                                                                |                                      |                            |
| <b>Tuscany region</b> | 259                                                            | 5743                                 | 4.50%                      |
| North-West AV         | 97                                                             | 1990                                 | 4.87%                      |
| Centre AV             | 80                                                             | 2249                                 | 3.55%                      |
| South-East AV         | 82                                                             | 1504                                 | 5.45%                      |
| <b>Ixekizumab</b>     |                                                                |                                      |                            |
| <b>Tuscany region</b> | 136                                                            | 5743                                 | 2.37%                      |
| North-West AV         | 53                                                             | 1990                                 | 2.66%                      |
| Centre AV             | 43                                                             | 2249                                 | 1.91%                      |
| South-East AV         | 40                                                             | 1504                                 | 2.66%                      |
| <b>Infliximab</b>     |                                                                |                                      |                            |
| <b>Tuscany region</b> | 97                                                             | 5743                                 | 1.69%                      |
| North-West AV         | 35                                                             | 1990                                 | 1.76%                      |
| Centre AV             | 57                                                             | 2249                                 | 2.53%                      |
| South-East AV         | 5                                                              | 1504                                 | 0.33%                      |
| <b>Guselkumab</b>     |                                                                |                                      |                            |
| <b>Tuscany region</b> | 94                                                             | 5743                                 | 1.64%                      |
| North-West AV         | 39                                                             | 1990                                 | 1.96%                      |
| Centre AV             | 29                                                             | 2249                                 | 1.29%                      |
| South-East AV         | 26                                                             | 1504                                 | 1.73%                      |
| <b>Certolizumab</b>   |                                                                |                                      |                            |
| <b>Tuscany region</b> | 59                                                             | 5743                                 | 1.03%                      |
| North-West AV         | 14                                                             | 1990                                 | 0.70%                      |
| Centre AV             | 27                                                             | 2249                                 | 1.20%                      |
| South-East AV         | 18                                                             | 1504                                 | 1.19%                      |

Table S3

| Adalimumab     |                                                                                                                    |                                                              |        |
|----------------|--------------------------------------------------------------------------------------------------------------------|--------------------------------------------------------------|--------|
|                | Number of psoriatic patients treated in 2020 with Adalimumab that received as first supply a first-line treatment  | Number of psoriatic patients treated in 2020 with Adalimumab | %      |
| Tuscany region | 165                                                                                                                | 634                                                          | 26.02% |
| North-West AV  | 73                                                                                                                 | 267                                                          | 27.34% |
| Centre AV      | 43                                                                                                                 | 187                                                          | 22.99% |
| South-East AV  | 49                                                                                                                 | 180                                                          | 27.22% |
|                | Number of psoriatic patients treated in 2020 with Adalimumab that received Adalimumab as first supply              | Number of psoriatic patients treated in 2020 with Adalimumab | %      |
| Tuscany region | 407                                                                                                                | 634                                                          | 64.19% |
| North-West AV  | 175                                                                                                                | 267                                                          | 65.54% |
| Centre AV      | 123                                                                                                                | 187                                                          | 65.77% |
| South-East AV  | 109                                                                                                                | 180                                                          | 60.55% |
|                | Number of psoriatic patients treated in 2020 with Adalimumab that received a second-line treatment as first supply | Number of psoriatic patients treated in 2020 with Adalimumab | %      |
| Tuscany region | 62                                                                                                                 | 634                                                          | 9.77%  |
| North-West AV  | 19                                                                                                                 | 267                                                          | 7.11%  |
| Centre AV      | 21                                                                                                                 | 187                                                          | 11.22% |
| South-East AV  | 22                                                                                                                 | 180                                                          | 12.22% |
| Etanercept     |                                                                                                                    |                                                              |        |
|                | Number of psoriatic patients treated in 2020 with Etanercept that received as first supply a first-line treatment  | Number of psoriatic patients treated in 2020 with Etanercept | %      |
| Tuscany region | 131                                                                                                                | 412                                                          | 31.79% |
| North-West AV  | 51                                                                                                                 | 150                                                          | 34.00% |
| Centre AV      | 49                                                                                                                 | 150                                                          | 32.67% |
| South-East AV  | 31                                                                                                                 | 112                                                          | 27.68% |
|                | Number of psoriatic patients treated in 2020 with Etanercept that received Etanercept as first supply              | Number of psoriatic patients treated in 2020 with Etanercept | %      |
| Tuscany region | 255                                                                                                                | 412                                                          | 61.89% |
| North-West AV  | 92                                                                                                                 | 150                                                          | 61.33% |
| Centre AV      | 93                                                                                                                 | 150                                                          | 62.00% |
| South-East AV  | 70                                                                                                                 | 112                                                          | 62.50% |
|                | Number of psoriatic patients treated in 2020 with Etanercept that received a second-line treatment as first supply | Number of psoriatic patients treated in 2020 with Etanercept | %      |
| Tuscany region | 26                                                                                                                 | 412                                                          | 6.31%  |
| North-West AV  | 7                                                                                                                  | 150                                                          | 4.67%  |
| Centre AV      | 8                                                                                                                  | 150                                                          | 5.33%  |
| South-East AV  | 11                                                                                                                 | 112                                                          | 9.82%  |

| <b>Certolizumab</b>   |                                                                                                                             |                                                                       |          |
|-----------------------|-----------------------------------------------------------------------------------------------------------------------------|-----------------------------------------------------------------------|----------|
|                       | <b>Number of psoriatic patients treated in 2020 with Certolizumab that received as first supply a first-line treatment</b>  | <b>Number of psoriatic patients treated in 2020 with Certolizumab</b> | <b>%</b> |
| <b>Tuscany region</b> | 9                                                                                                                           | 59                                                                    | 15.25%   |
| North-West AV         | 4                                                                                                                           | 14                                                                    | 28.57%   |
| Centre AV             | 3                                                                                                                           | 27                                                                    | 11.11%   |
| South-East AV         | 2                                                                                                                           | 18                                                                    | 11.11%   |
|                       | <b>Number of psoriatic patients treated in 2020 with Certolizumab that received Certolizumab as first supply</b>            | <b>Number of psoriatic patients treated in 2020 with Certolizumab</b> | <b>%</b> |
| <b>Tuscany region</b> | 24                                                                                                                          | 59                                                                    | 40.67%   |
| North-West AV         | 4                                                                                                                           | 14                                                                    | 28.57%   |
| Centre AV             | 16                                                                                                                          | 27                                                                    | 59.25%   |
| South-East AV         | 4                                                                                                                           | 18                                                                    | 22.22%   |
|                       | <b>Number of psoriatic patients treated in 2020 with Certolizumab that received a second-line treatment as first supply</b> | <b>Number of psoriatic patients treated in 2020 with Certolizumab</b> | <b>%</b> |
| <b>Tuscany region</b> | 26                                                                                                                          | 59                                                                    | 44.06%   |
| North-West AV         | 6                                                                                                                           | 14                                                                    | 42.85%   |
| Centre AV             | 8                                                                                                                           | 27                                                                    | 29.62%   |
| South-East AV         | 12                                                                                                                          | 18                                                                    | 66.66%   |
| <b>Infliximab</b>     |                                                                                                                             |                                                                       |          |
|                       | <b>Number of psoriatic patients treated in 2020 with Infliximab that received as first supply a first-line treatment</b>    | <b>Number of psoriatic patients treated in 2020 with Infliximab</b>   | <b>%</b> |
| <b>Tuscany region</b> | 4                                                                                                                           | 97                                                                    | 4.12%    |
| North-West AV         | 0                                                                                                                           | 35                                                                    | 0        |
| Centre AV             | 4                                                                                                                           | 57                                                                    | 7.02%    |
| South-East AV         | 0                                                                                                                           | 5                                                                     | 0        |
|                       | <b>Number of psoriatic patients treated in 2020 with Infliximab that received Infliximab as first supply</b>                | <b>Number of psoriatic patients treated in 2020 with Infliximab</b>   | <b>%</b> |
| <b>Tuscany region</b> | 75                                                                                                                          | 97                                                                    | 77.31%   |
| North-West AV         | 30                                                                                                                          | 35                                                                    | 85.71%   |
| Centre AV             | 41                                                                                                                          | 57                                                                    | 71.93%   |
| South-East AV         | 4                                                                                                                           | 5                                                                     | 80.00%   |
|                       | <b>Number of psoriatic patients treated in 2020 with Infliximab that received a second-line treatment as first supply</b>   | <b>Number of psoriatic patients treated in 2020 with Infliximab</b>   | <b>%</b> |
| <b>Tuscany region</b> | 18                                                                                                                          | 97                                                                    | 18.55%   |
| North-West AV         | 5                                                                                                                           | 35                                                                    | 14.28%   |
| Centre AV             | 12                                                                                                                          | 57                                                                    | 21.05%   |
| South-East AV         | 1                                                                                                                           | 5                                                                     | 20.00%   |

| Sekukinumab           |                                                                                                                     |                                                               |        |
|-----------------------|---------------------------------------------------------------------------------------------------------------------|---------------------------------------------------------------|--------|
|                       | Number of psoriatic patients treated in 2020 with Sekukinumab that received as first supply a first-line treatment  | Number of psoriatic patients treated in 2020 with Sekukinumab | %      |
| <b>Tuscany region</b> | 88                                                                                                                  | 285                                                           | 30.87% |
| North-West AV         | 28                                                                                                                  | 97                                                            | 28.86% |
| Centre AV             | 30                                                                                                                  | 97                                                            | 30.92% |
| South-East AV         | 30                                                                                                                  | 91                                                            | 32.96% |
|                       | Number of psoriatic patients treated in 2020 with Sekukinumab that received Sekukinumab as first supply             | Number of psoriatic patients treated in 2020 with Sekukinumab | %      |
| <b>Tuscany region</b> | 72                                                                                                                  | 285                                                           | 25.26% |
| North-West AV         | 20                                                                                                                  | 97                                                            | 20.61% |
| Centre AV             | 25                                                                                                                  | 97                                                            | 25.77% |
| South-East AV         | 27                                                                                                                  | 91                                                            | 29.67% |
|                       | Number of psoriatic patients treated in 2020 with Sekukinumab that received a second-line treatment as first supply | Number of psoriatic patients treated in 2020 with Sekukinumab | %      |
| <b>Tuscany region</b> | 125                                                                                                                 | 285                                                           | 43.85% |
| North-West AV         | 49                                                                                                                  | 97                                                            | 50.51% |
| Centre AV             | 42                                                                                                                  | 97                                                            | 43.29% |
| South-East AV         | 34                                                                                                                  | 91                                                            | 37.36% |
| Ustekinumab           |                                                                                                                     |                                                               |        |
|                       | Number of psoriatic patients treated in 2020 with Ustekinumab that received as first supply a first-line treatment  | Number of psoriatic patients treated in 2020 with Ustekinumab | %      |
| <b>Tuscany region</b> | 52                                                                                                                  | 259                                                           | 20.07% |
| North-West AV         | 22                                                                                                                  | 97                                                            | 22.68% |
| Centre AV             | 17                                                                                                                  | 80                                                            | 21.25% |
| South-East AV         | 13                                                                                                                  | 82                                                            | 15.85% |
|                       | Number of psoriatic patients treated in 2020 with Ustekinumab that received Ustekinumab as first supply             | Number of psoriatic patients treated in 2020 with Ustekinumab | %      |
| <b>Tuscany region</b> | 145                                                                                                                 | 259                                                           | 55.98% |
| North-West AV         | 53                                                                                                                  | 97                                                            | 54.63% |
| Centre AV             | 39                                                                                                                  | 80                                                            | 48.75% |
| South-East AV         | 53                                                                                                                  | 82                                                            | 64.63% |
|                       | Number of psoriatic patients treated in 2020 with Ustekinumab that received a second-line treatment as first supply | Number of psoriatic patients treated in 2020 with Ustekinumab | %      |
| <b>Tuscany region</b> | 62                                                                                                                  | 259                                                           | 23.93% |
| North-West AV         | 22                                                                                                                  | 97                                                            | 22.68% |
| Centre AV             | 24                                                                                                                  | 80                                                            | 30.00% |
| South-East AV         | 16                                                                                                                  | 82                                                            | 19.51% |

| <b>Guselkumab</b>     |                                                                                                                           |                                                                     |          |
|-----------------------|---------------------------------------------------------------------------------------------------------------------------|---------------------------------------------------------------------|----------|
|                       | <b>Number of psoriatic patients treated in 2020 with Guselkumab that received as first supply a first-line treatment</b>  | <b>Number of psoriatic patients treated in 2020 with Guselkumab</b> | <b>%</b> |
| <b>Tuscany region</b> | 38                                                                                                                        | 94                                                                  | 40.42%   |
| North-West AV         | 17                                                                                                                        | 39                                                                  | 43.58%   |
| Centre AV             | 12                                                                                                                        | 29                                                                  | 41.37%   |
| South-East AV         | 9                                                                                                                         | 26                                                                  | 34.61%   |
|                       | <b>Number of psoriatic patients treated in 2020 with Guselkumab that received Guselkumab as first supply</b>              | <b>Number of psoriatic patients treated in 2020 with Guselkumab</b> | <b>%</b> |
| <b>Tuscany region</b> | 14                                                                                                                        | 94                                                                  | 14.89%   |
| North-West AV         | 9                                                                                                                         | 39                                                                  | 23.07%   |
| Centre AV             | 1                                                                                                                         | 29                                                                  | 3.44%    |
| South-East AV         | 4                                                                                                                         | 26                                                                  | 15.38%   |
|                       | <b>Number of psoriatic patients treated in 2020 with Guselkumab that received a second-line treatment as first supply</b> | <b>Number of psoriatic patients treated in 2020 with Guselkumab</b> | <b>%</b> |
| <b>Tuscany region</b> | 42                                                                                                                        | 94                                                                  | 44.68%   |
| North-West AV         | 13                                                                                                                        | 39                                                                  | 33.33%   |
| Centre AV             | 16                                                                                                                        | 29                                                                  | 55.17%   |
| South-East AV         | 13                                                                                                                        | 26                                                                  | 50.00%   |
| <b>Ixekizumab</b>     |                                                                                                                           |                                                                     |          |
|                       | <b>Number of psoriatic patients treated in 2020 with Ixekizumab that received as first supply a first-line treatment</b>  | <b>Number of psoriatic patients treated in 2020 with Ixekizumab</b> | <b>%</b> |
| <b>Tuscany region</b> | 61                                                                                                                        | 136                                                                 | 44.85%   |
| North-West AV         | 24                                                                                                                        | 53                                                                  | 45.28%   |
| Centre AV             | 17                                                                                                                        | 43                                                                  | 39.53%   |
| South-East AV         | 20                                                                                                                        | 40                                                                  | 50.00%   |
|                       | <b>Number of psoriatic patients treated in 2020 with Ixekizumab that received Ixekizumab as first supply</b>              | <b>Number of psoriatic patients treated in 2020 with Ixekizumab</b> | <b>%</b> |
| <b>Tuscany region</b> | 12                                                                                                                        | 136                                                                 | 8.82%    |
| North-West AV         | 5                                                                                                                         | 53                                                                  | 9.43%    |
| Centre AV             | 2                                                                                                                         | 43                                                                  | 4.65%    |
| South-East AV         | 5                                                                                                                         | 40                                                                  | 12.50%   |
|                       | <b>Number of psoriatic patients treated in 2020 with Ixekizumab that received a second-line treatment as first supply</b> | <b>Number of psoriatic patients treated in 2020 with Ixekizumab</b> | <b>%</b> |
| <b>Tuscany region</b> | 63                                                                                                                        | 136                                                                 | 46.32%   |
| North-West AV         | 24                                                                                                                        | 53                                                                  | 45.28%   |
| Centre AV             | 24                                                                                                                        | 43                                                                  | 55.81%   |
| South-East AV         | 15                                                                                                                        | 40                                                                  | 37.50%   |
